# Supplementary material for: Cohort profile: The MULTI sTUdy Diabetes rEsearch (MULTITUDE) consortium
Source: PubMed Central journal article supplement — BMJ Open. 2018 May 5;8(5):e020640. doi: 10.1136/bmjopen-2017-020640 (PMC5942412; doi:10.1136/bmjopen-2017-020640), 2018-05-05
Supplement: bmjopen-2017-020640supp001.pdf [file bmjopen-2017-020640supp001.pdf]

**Supplementary Table 1. Summary of 17 cohort studies and clinical trial included in the MULTI sTUDy Diabetes rEsearch (MULTITUDE) Consortium**

| Data sets                                                                       | Study type                                              | Sample size | Time range | Follow up time     | Population                                                                                                                                      | Intervention/ exposure                                                                                                                                                        | Control                                                                          | Outcome                                                                                                                                                           |
|---------------------------------------------------------------------------------|---------------------------------------------------------|-------------|------------|--------------------|-------------------------------------------------------------------------------------------------------------------------------------------------|-------------------------------------------------------------------------------------------------------------------------------------------------------------------------------|----------------------------------------------------------------------------------|-------------------------------------------------------------------------------------------------------------------------------------------------------------------|
| Action to Control Cardiovascular Risk in Diabetes (ACCORD)                      | Clinical trial-multicenter, double 2x2 factorial design | 10,251      | 1999-2009  | 4 to 8 years       | Patients with T2DM                                                                                                                              | Intensive glycemic control, intensive blood pressure control, fibrate use <sup>1</sup>                                                                                        | Standard glycemic control, standard blood pressure control, placebo <sup>1</sup> | First occurrence of a major CVD, specifically nonfatal MI, nonfatal stroke, or CVD death                                                                          |
| Atrial Fibrillation Follow-Up Investigation of Rhythm Management (AFFIRM)       | Clinical trial                                          | 4,060       | 1995-2002  | 5 years            | Patients who had a total of 6 hours of atrial fibrillation in more than 1 episode and one of episodes was in last 12 weeks before trial started | Optimized antiarrhythmic drug therapy administered to attempt to maintain sinus rhythm                                                                                        | Optimized therapy which merely controls the heart rate                           | Total mortality                                                                                                                                                   |
| Bypass Angioplasty Revascularization Investigation in Type 2 Diabetes (BARI 2D) | Clinical trial-multicenter, double 2x2 factorial design | 2,368       | 2000-2009  | 5 years            | Patients with T2DM who undergo coronary angiography at participating BARI2D institutions                                                        | Prompt coronary revascularization, insulin sensitization                                                                                                                      | Medical therapy alone, insulin provision                                         | Death rate and major cardiovascular events                                                                                                                        |
| Atherosclerosis Risk in Communities (ARIC)                                      | Prospective cohort                                      | 4,000       | 1987-      | 5 exams as of now  | Patients aged 45-64 from a defined population in their community                                                                                | Risk factors of atherosclerosis, CHD, heart failure, stroke, atrial fibrillation genetic, and environmental factors leading to ventricular dysfunction and vascular stiffness | N.A.                                                                             | Cardiovascular events, including CHD, heart failure, stroke, and atrial fibrillation; and the risk factors related to progression of subclinical to clinical CVD. |
| The Jackson Heart Study (JHS)                                                   | Prospective cohort                                      | 5,301       | 2000-      | 3 exams as of now  | African American men and women, age 35-84 at entry                                                                                              | Biological, psychosocial, and behavioral factors with the incidence atherosclerotic events and health outcomes                                                                | N.A.                                                                             | Atherosclerotic events                                                                                                                                            |
| FHS-cohort                                                                      | Prospective cohort                                      | 5,209       | 1948-      | 32 exams as of now | Framingham residents                                                                                                                            | Genetic and environmental factors influencing the development of cardiovascular and other diseases                                                                            | N.A.                                                                             | CVD                                                                                                                                                               |
| FHS-gen3                                                                        | Prospective cohort                                      | 4,095       | 2002-      | 2 exams as of      | At least one parent in the Offspring cohort or one                                                                                              | Genetic and environmental factors                                                                                                                                             | N.A.                                                                             | CVD                                                                                                                                                               |

|                                                                                                |                                                                                                                 |                                                    |           |                                                           |                                                                                                                                                                                                                                                                                      |                                                                                                                                                                                                                                                                             |                                                                                                                                                      |                                                                                                                                                |
|------------------------------------------------------------------------------------------------|-----------------------------------------------------------------------------------------------------------------|----------------------------------------------------|-----------|-----------------------------------------------------------|--------------------------------------------------------------------------------------------------------------------------------------------------------------------------------------------------------------------------------------------------------------------------------------|-----------------------------------------------------------------------------------------------------------------------------------------------------------------------------------------------------------------------------------------------------------------------------|------------------------------------------------------------------------------------------------------------------------------------------------------|------------------------------------------------------------------------------------------------------------------------------------------------|
|                                                                                                |                                                                                                                 |                                                    |           | now                                                       | grandparent in Original cohort                                                                                                                                                                                                                                                       | influencing the development of cardiovascular and other diseases                                                                                                                                                                                                            |                                                                                                                                                      |                                                                                                                                                |
| FHS-offspring                                                                                  | Prospective cohort                                                                                              | 5,124                                              | 1971-     | 9 exams as of now                                         | Offspring of Original Cohort or spouse of Offspring                                                                                                                                                                                                                                  | Genetic and environmental factors influencing the development of cardiovascular and other diseases                                                                                                                                                                          | N.A.                                                                                                                                                 | CVD                                                                                                                                            |
| Functional Outcomes in Cardiovascular Patients Undergoing Surgical Hip Fracture Repair (FOCUS) | Clinical trial                                                                                                  | 2,016                                              | 2003-2009 | 60 days                                                   | Patients 50 years of age or older who were undergoing primary surgical repair of a hip fracture and who had clinical evidence of or risk factors for cardiovascular disease were eligible if they had a hemoglobin level of less than 10 g/dL within 3 days after surgery.           | Liberal-strategy group                                                                                                                                                                                                                                                      | Restrictive-strategy group                                                                                                                           | Death or an inability to walk 10 feet without human assistance at the 60-day follow-up                                                         |
| Multiple Risk Factor Intervention Trial for the Prevention of Coronary Heart Disease (MRFIT)   | Clinical trial                                                                                                  | 12,866                                             | 1972-1998 | 6-8 years                                                 | Men aged 35-57 years, who met the requirements <sup>2</sup>                                                                                                                                                                                                                          | Eating pattern resulting in a nutrient intake of 30% to 35% of calories from fat, 10% (later 8%) from saturated and 10% from polyunsaturated fat; approximately 300 (later 250) mg of cholesterol; modification of carbohydrates; cease cigarettes; hypertension management | Referred to their personal physician or other source of care for such management of their risk factors as considered appropriate by these providers. | Mortality from coronary heart disease                                                                                                          |
| Antihypertensive and Lipid-Lowering Treatment to Prevent Heart Attack Trial (ALLHAT)           | Hypertension study: Clinical trial-double blinded, active controlled<br><br>Lipid study: randomized, nonblinded | Hypertension study: 33,357;<br>Lipid study: 10,355 | 1993-2002 | Hypertension study: 4-8 years<br><br>Lipid study: 8 years | Hypertension Study: Participants aged 55 years or older with hypertension and at least 1 other CHD risk factor from 623 North American centers.<br><br>Lipid study: Ambulatory persons (n = 10 355), aged 55 years or older, with low-density lipoprotein cholesterol (LDL-C) of 120 | Hypertension study: chlorthalidone, 12.5 to 25 mg/d<br><br>Lipid study: pravastatin, 40 mg/d                                                                                                                                                                                | Hypertension study: amlodipine, 2.5 to 10 mg/d, lisinopril, 10 to 40 mg/d<br><br>Lipid study: usual care                                             | Hypertension study: combined fatal CHD or nonfatal myocardial infarction, analyzed by intent-to-treat.<br><br>Lipid study: all-cause mortality |

|                                                                          |                          |        |           |                   |                                                                                                                                                                                                                                                                                                                              |                                                                                                  |                       |                                                                                              |
|--------------------------------------------------------------------------|--------------------------|--------|-----------|-------------------|------------------------------------------------------------------------------------------------------------------------------------------------------------------------------------------------------------------------------------------------------------------------------------------------------------------------------|--------------------------------------------------------------------------------------------------|-----------------------|----------------------------------------------------------------------------------------------|
|                                                                          | trial                    |        |           |                   | to 189 mg/dL (100 to 129 mg/dL if known CHD) and triglycerides lower than 350 mg/dL                                                                                                                                                                                                                                          |                                                                                                  |                       |                                                                                              |
| Bogalusa Heart Study (BHS)                                               | Prospective cohort study | 11,796 | 1972-     | 7 exams as of now | Participants that attended at least one of seven cross-sectional pediatric exams and/or the 1995-96 adult examination. Subjects were ranged in age from 3 to 20 years at the pediatric exams and 20-37 at the time of the adult exam.                                                                                        | Lifestyle attributes such as tobacco use, physical inactivity, and a high-fat, high calorie diet | N.A.                  | Natural history of cardiovascular disease                                                    |
| Cardiovascular Outcomes in Renal Atherosclerotic Lesions (CORAL)         | Clinical trial           | 947    | 2004-2013 | 31-55 months      | Individuals with severe renal-artery stenosis were eligible if they had hypertension with a systolic blood pressure of 155 mm Hg or higher while receiving two or more antihypertensive medications.                                                                                                                         | Stenting plus medical therapy                                                                    | Medical therapy alone | The occurrence of a major cardiovascular or renal event;                                     |
| NHLBI Growth and Health Study (NGHS)                                     | Prospective cohort       | 2,379  | 1985-2000 | 9 years           | Girls 9 and 10 years of age in two communities (Richmond, California and Cincinnati, Ohio) and also from families enrolled in a health maintenance organization in the Washington, D.C. area. A total of 2,379 girls were enrolled in the study between 1987-88. Slightly more than half of the cohort was African-American. | Psychosocial factors and obesity                                                                 | N.A.                  | The development of obesity and the effects of obesity on cardiovascular disease risk factors |
| Optimal Macronutrient Intake Trial to Prevent Heart Disease (OMNI Heart) | Clinical trial-crossover | 164    | 2002-2008 | 18 weeks          | Healthy adults, age $\geq 30$ years with a systolic blood pressure (SBP) 120-159 mm Hg or diastolic blood pressure (DBP) 80-99 mm Hg.                                                                                                                                                                                        | 3 healthy diets, each with reduced saturated fat intake, on blood pressure and serum lipids.     | N.A.                  | Blood pressure and serum lipids.                                                             |

|                                                                                                      |                               |       |           |            |                                                                                                                                                                                                                                       |                                                                 |                                                         |                                                                                                                                          |
|------------------------------------------------------------------------------------------------------|-------------------------------|-------|-----------|------------|---------------------------------------------------------------------------------------------------------------------------------------------------------------------------------------------------------------------------------------|-----------------------------------------------------------------|---------------------------------------------------------|------------------------------------------------------------------------------------------------------------------------------------------|
| Practice Based Opportunities for Weight Reduction Trial at the University of Pennsylvania (POWER-UP) | Clinical trial                | 390   | 2008-2011 | 24 months  | Participants with the age of 21 years or older, a body-mass index of 30 to 50, and at least two of five components of the metabolic syndrome to increase the likelihood that the participants would have cardiovascular risk factors. | Brief lifestyle counseling, enhanced brief lifestyle counseling | Usual care                                              | Weight loss                                                                                                                              |
| Systolic Blood Pressure Intervention Trial Primary Outcome Paper (SPRINT-POP) Data                   | Clinical trial-single blinded | 9,361 | 2010-2016 | 3.26 years | Adults 50 years of age or more with a systolic blood pressure of 130 to 180 mm Hg with an increased risk of cardiovascular disease but without diabetes or a history of stroke                                                        | An intensive systolic blood pressure target of 120 mm Hg        | A systolic blood pressure target of less than 140 mm Hg | A composite outcome of myocardial infarction, other acute coronary syndromes, stroke, heart failure, or death from cardiovascular causes |

<sup>1</sup>Detailed study design could be found in the Figure 1.2 of ACCORD protocol.

<sup>2</sup>Detailed requirements could be found in Chapter 4 of protocol under MOOP folder.



|      |   |   |   |  |  |  |  |  |   |   |  |  |   |  |  |   |   |
|------|---|---|---|--|--|--|--|--|---|---|--|--|---|--|--|---|---|
| OR   | + | + |   |  |  |  |  |  |   | + |  |  |   |  |  |   | + |
| PA   |   | + | + |  |  |  |  |  | + | + |  |  |   |  |  | + | + |
| RI   |   | + | + |  |  |  |  |  | + |   |  |  | + |  |  |   |   |
| SC   | + | + |   |  |  |  |  |  |   | + |  |  |   |  |  |   | + |
| SD   |   | + |   |  |  |  |  |  |   |   |  |  |   |  |  |   |   |
| TN   | + | + | + |  |  |  |  |  |   |   |  |  |   |  |  |   | + |
| TX   |   | + | + |  |  |  |  |  | + |   |  |  | + |  |  |   | + |
| UT   |   | + |   |  |  |  |  |  |   |   |  |  |   |  |  |   | + |
| VT   |   |   | + |  |  |  |  |  |   |   |  |  |   |  |  |   |   |
| VA   |   | + | + |  |  |  |  |  | + |   |  |  |   |  |  |   |   |
| WA   | + | + |   |  |  |  |  |  |   |   |  |  |   |  |  |   |   |
| WV   |   | + |   |  |  |  |  |  |   |   |  |  | + |  |  |   |   |
| WI   |   | + |   |  |  |  |  |  |   |   |  |  |   |  |  |   |   |
| WY   |   |   |   |  |  |  |  |  |   |   |  |  |   |  |  |   |   |
| D.C. | + | + | + |  |  |  |  |  |   |   |  |  |   |  |  |   | + |

All states are denoted by two-letter abbreviation.

**Supplementary Table 3. Baseline patient/participant information from cohorts included in the MULTI sTudy Diabetes rEsearch (MULTITUDE) Consortium**

| Data sets     | Hispanic Origin | Insurance | Income | Marital Status | Employment | Education | Hospita-lizations | Alcohol Intake | Smoking Status | Family History | Dietary Intake | Physical Activity | BP | BMI | WC |
|---------------|-----------------|-----------|--------|----------------|------------|-----------|-------------------|----------------|----------------|----------------|----------------|-------------------|----|-----|----|
| ACCORD        |                 | +         |        |                |            | +         | +                 | +              | +              | CVD            | +              | +                 | +  | +   | +  |
| AFFIRM        |                 |           |        |                | +          | +         | +                 |                | +              |                |                |                   | +  | +   |    |
| BARI 2D       | +               | +         |        |                | +          | +         | +                 | +              | +              |                |                | +                 | +  | +   | +  |
| ARIC          |                 | +         | +      | +              | +          | +         | +                 | +              | +              | CVD            | +              | +                 | +  | +   |    |
| JHS           |                 | +         | +      |                | +          | +         | +                 | +              | +              |                | +              | +                 | +  | +   | +  |
| FHS-cohort    | +               | +         |        | +              | +          | +         | +                 | +              | +              | T2DM           | +              | +                 | +  | +   | +  |
| FHS-offspring | +               | +         | +      | +              | +          | +         | +                 | +              | +              |                | +              | +                 | +  | +   | +  |
| FHS-gen3      | +               | +         | +      | +              | +          | +         | +                 | +              | +              |                | +              | +                 | +  | +   | +  |
| FOCUS         |                 |           |        |                |            |           | +                 |                | +              |                |                |                   |    |     |    |
| MRFIT         |                 |           | +      | +              | +          | +         | +                 | +              | +              | CVD, T2DM      | +              | +                 |    | +   |    |
| ALLHAT        | +               |           |        |                |            | +         | +                 | +              | +              |                | +              |                   | +  | +   |    |
| BHS           |                 |           | +      |                | +          | +         |                   | +              | +              | CVD, T2DM      | +              | +                 | +  | +   | +  |
| CORAL         | +               |           | +      | +              | +          |           | +                 |                | +              |                |                |                   | +  | +   |    |
| NGHS          |                 |           | +      |                | +          | +         |                   | +              | +              | CVD, T2DM      | +              | +                 | +  | +   | +  |
| OMNI Heart    |                 |           | +      | +              |            | +         | +                 | +              | +              |                | +              |                   | +  | +   |    |
| POWER-UP      | +               | +         | +      | +              | +          | +         | +                 | +              | +              |                | +              | +                 | +  | +   | +  |
| SPRINT-POP    | +               |           |        |                |            |           | +                 |                | +              |                |                |                   | +  | +   |    |

BP, Blood pressure; BMI, Body mass index; WC, Waist circumference; CVD, Cardiovascular disease; T2DM, Type 2 diabetes mellitus

**Supplementary Table 4. Clinical lab values and biomarkers included in the MULTI sTUDy Diabetes rEsearch (MULTITUDE) Consortium**

| Data sets     | Fasting Glucose | Fasting Insulin | HbA1c | Lipids | Serum Creatinine | Potassium | Uric Acid | Serum Vitamin D | Urinary Albumin | C-reactive Protein | PAI |
|---------------|-----------------|-----------------|-------|--------|------------------|-----------|-----------|-----------------|-----------------|--------------------|-----|
| ACCORD        | +               |                 | +     | +      | +                | +         |           |                 | +               | +                  |     |
| AFFIRM        |                 |                 |       |        |                  | +         |           |                 |                 |                    |     |
| BARI 2D       | +               | +               | +     | +      | +                | +         |           |                 | +               | +                  | +   |
| ARIC          | +               | +               | +     | +      | +                | +         | +         |                 | +               | +                  |     |
| JHS           | +               | +               | +     | +      | +                | +         | +         |                 | +               | +                  |     |
| FHS-cohort    | +               |                 | +     | +      | +                | +         | +         | +               | +               |                    |     |
| FHS-offspring | +               | +               | +     | +      | +                | +         | +         | +               | +               | +                  | +   |
| FHS-gen3      | +               | +               | +     | +      | +                | +         | +         | +               | +               | +                  | +   |
| FOCUS         |                 |                 | +     |        | +                |           |           |                 |                 |                    |     |
| MRFIT         | +               |                 |       | +      |                  | +         |           |                 |                 |                    |     |
| ALLHAT        | +               |                 |       | +      | +                | +         |           |                 |                 |                    |     |
| BHS           | +               | +               | +     | +      | +                | +         | +         |                 | +               |                    |     |
| CORAL         | +               |                 | +     | +      | +                | +         |           |                 | +               |                    |     |
| NGHS          | +               | +               |       | +      |                  | +         |           | +               |                 |                    |     |
| OMNI Heart    | +               | +               |       | +      | +                | +         |           | +               |                 |                    |     |
| POWER-UP      | +               | +               |       | +      | +                | +         |           |                 |                 | +                  |     |
| SPRINT-POP    | +               |                 | +     | +      | +                | +         |           |                 | +               | +                  |     |

HbA1c, Hemoglobin A1c; PAI, Plasminogen activator inhibitor; ECHO, Ecocardiogram.
